# Supplementary material for: Highly selective ethanol gas sensor based on CdS/Ti3C2Tx MXene composites
Source: Royal Society of Chemistry journal article supplement (doi:10.1039/d4na00927d), 2025-01-01
Supplement: d4na00927d1.pdf [file d4na00927d1.pdf]

## Supporting Information

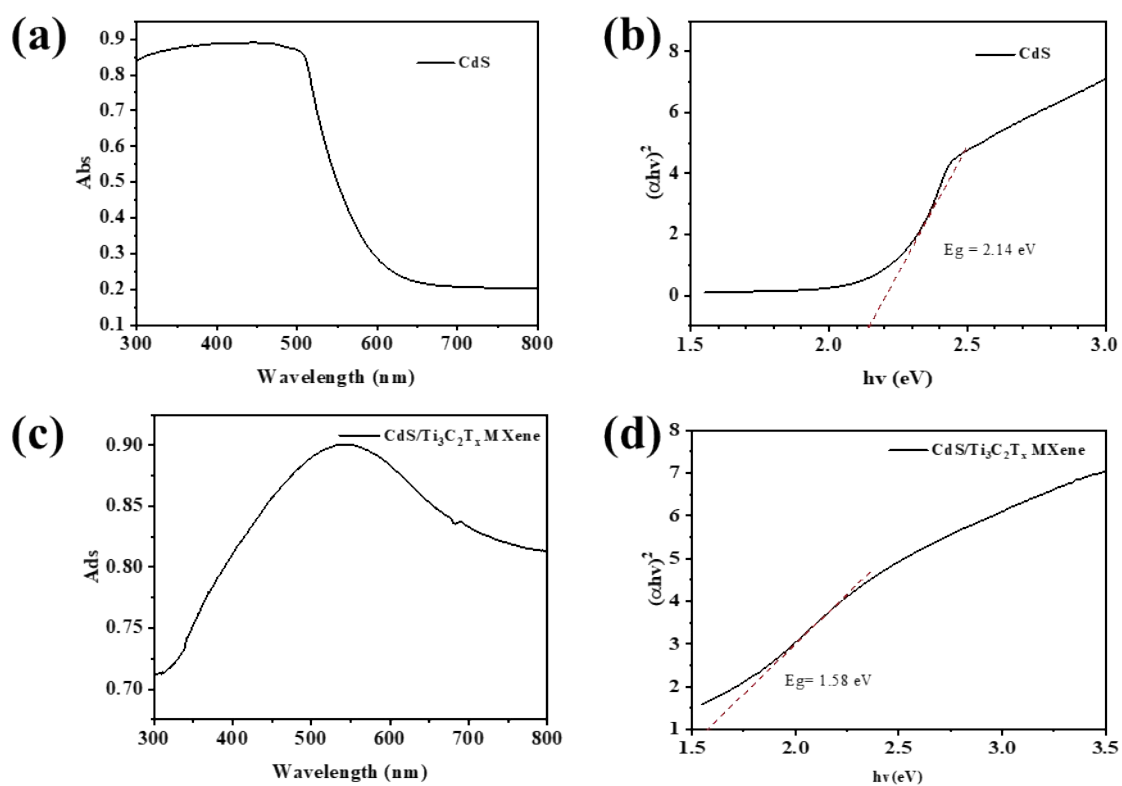

**Figure S1.** UV-Vis DRS (a, c) and Tauc plots (b, d) of CdS and CT2 heterostructure, respectively.
